# Supplementary material for: Temperature-dependent optical properties of CuFeO2 through the structural phase transition
Source: Royal Society of Chemistry journal article supplement (doi:10.1039/d1ra08096b), 2021-01-01
Supplement: d1ra08096b1.pdf [file d1ra08096b1.pdf]

## Temperature-dependent optical properties of $\text{CuFeO}_2$ through the structural phase transition

Hsiao-Wen Chen<sup>1</sup>, Chu-Yun Huang<sup>3</sup>, Guo-Jiun Shu<sup>2,3,4</sup>, and Hsiang-Lin Liu<sup>1,\*</sup>

<sup>1</sup>Department of Physics, National Taiwan Normal University, Taipei 116059, Taiwan

<sup>2</sup>Department of Materials and Mineral Resources Engineering, National Taipei University of Technology, Taipei 106344, Taiwan

<sup>3</sup>Institute of Mineral Resources Engineering, National Taipei University of Technology, Taipei 106344, Taiwan

<sup>4</sup>Taiwan Consortium of Emergent Crystalline Materials, Ministry of Science and Technology, Taipei 106214, Taiwan

\*Corresponding author: hliu@ntnu.edu.tw

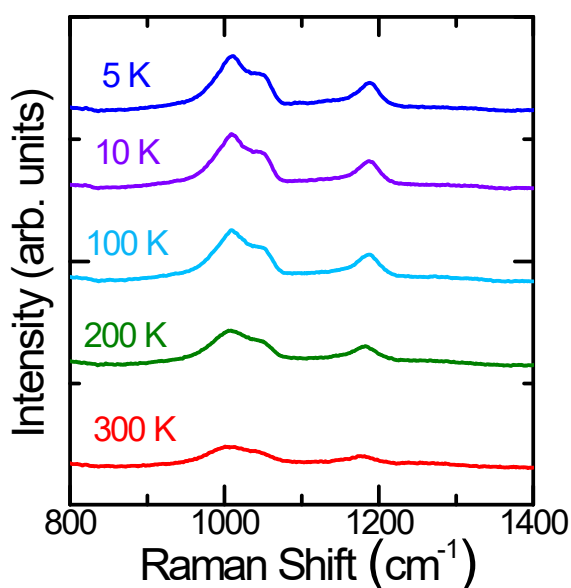

FIG. S1 Temperature-dependent Raman scattering spectra of the multiphonon modes of  $\text{CuFeO}_2$ .

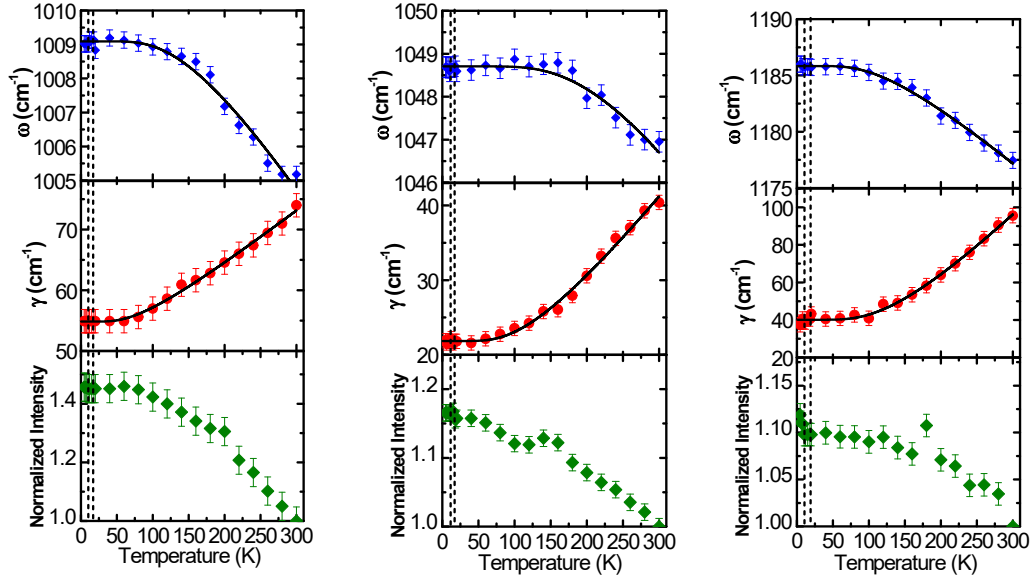

FIG. S2 Temperature-dependent frequency, linewidth, and normalized intensity of the multiphonon modes of  $\text{CuFeO}_2$ . The fitting results of the anharmonic model are represented in the solid lines. The vertical dashed lines denote the phase transition temperatures at 11 and 16 K.

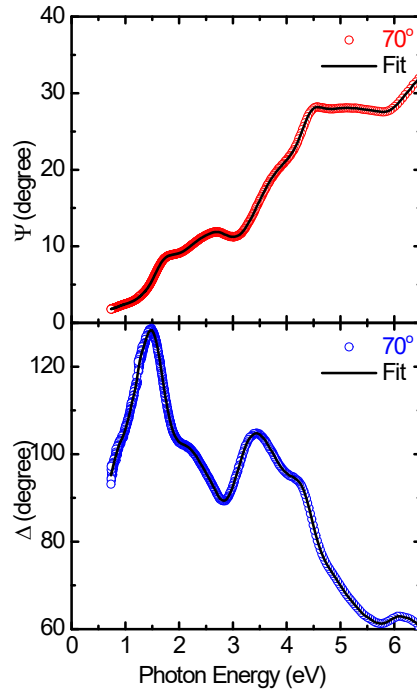

FIG. S3 Room temperature experimental at  $70^\circ$  incident angle and fitting model of ellipsometric variables of  $\Psi$  and  $\Delta$  of  $\text{CuFeO}_2$ .

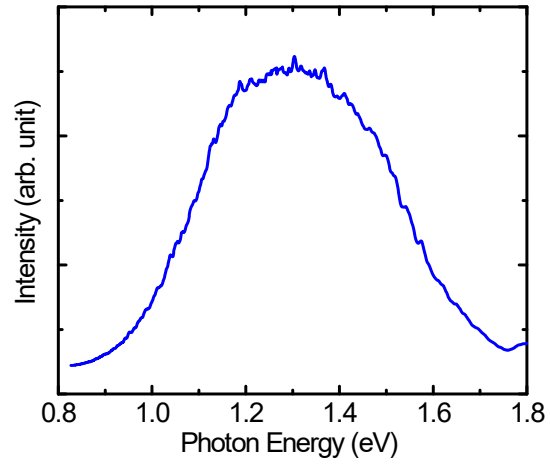

FIG. S4 Room temperature photoluminescence spectrum of CuFeO<sub>2</sub>.
